# Supplementary material
Source: Elsevier journal article supplement (https://comptes-rendus.academie-sciences.fr/chimie/article/10.1016/j.crci.2014.08.002/file/attach/mmc1.pdf)
Supplement: mmc1 [file mmc1.pdf]

**Supplementary Material:**

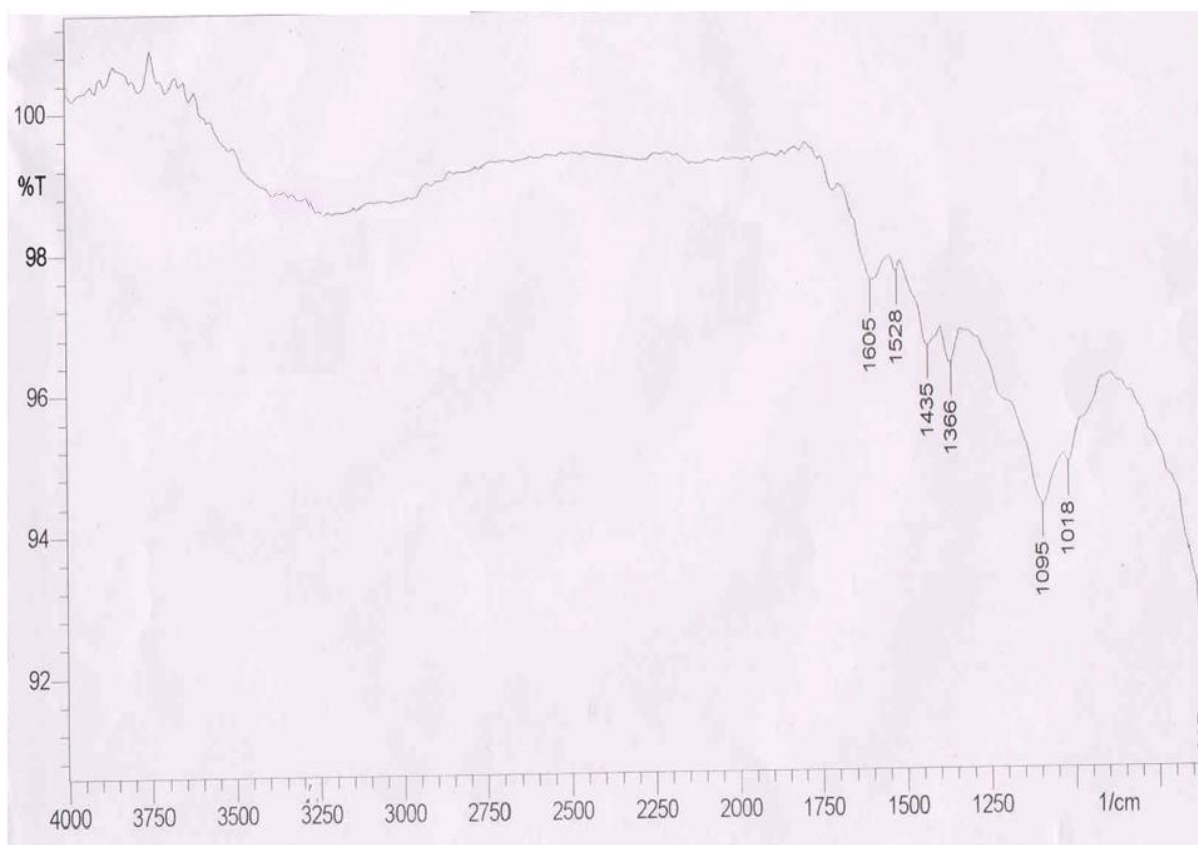

**Figure: S1(a) IR Spectrum of [Cr (C<sub>36</sub>H<sub>36</sub>N<sub>4</sub>) Cl] Cl<sub>2</sub>**

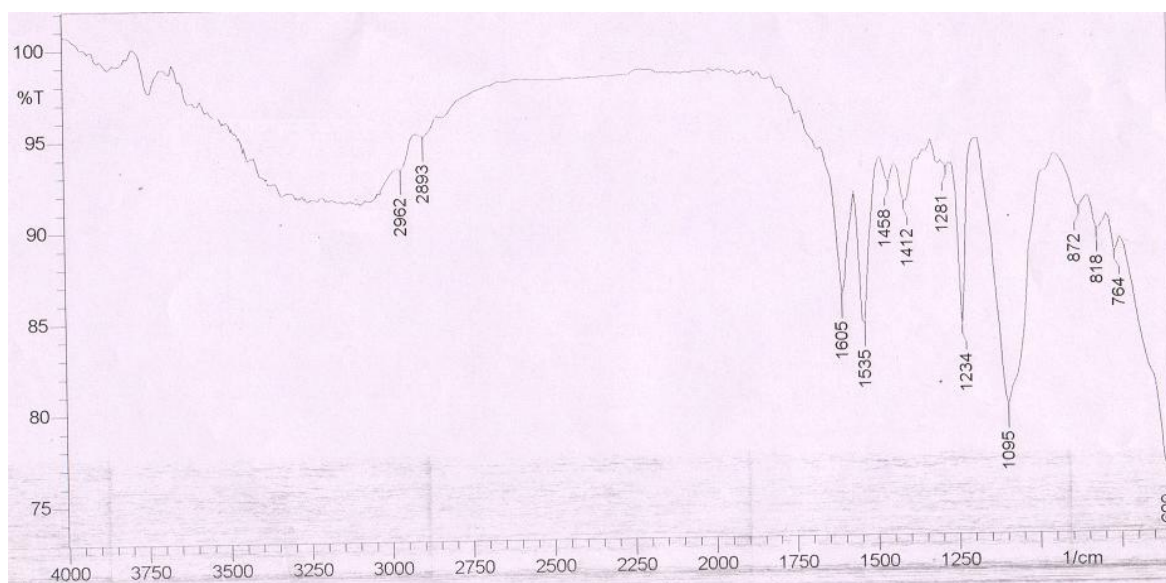

**Figure: S1(b) IR Spectrum of [Cr (C<sub>36</sub>H<sub>36</sub>N<sub>4</sub>) NO<sub>3</sub>] (NO<sub>3</sub>)<sub>2</sub>**

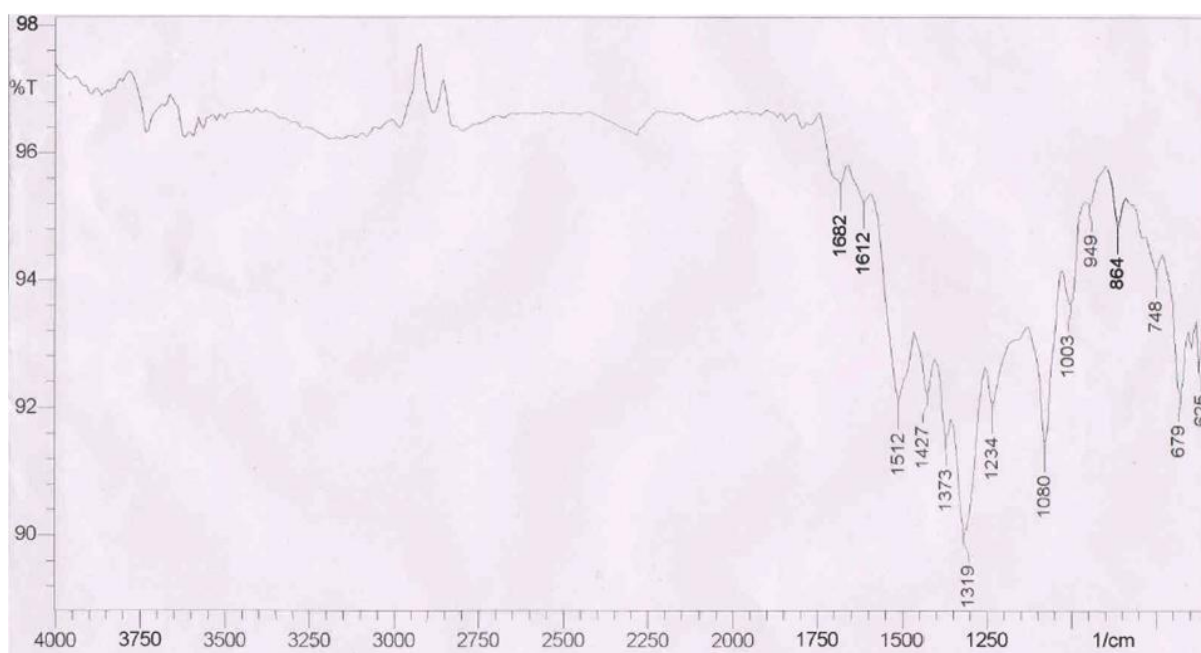

**Figure: S1(c) IR Spectrum of  $[\text{Cr} (\text{C}_{36}\text{H}_{36}\text{N}_4) (\text{OAc})] (\text{OAc})_2$**

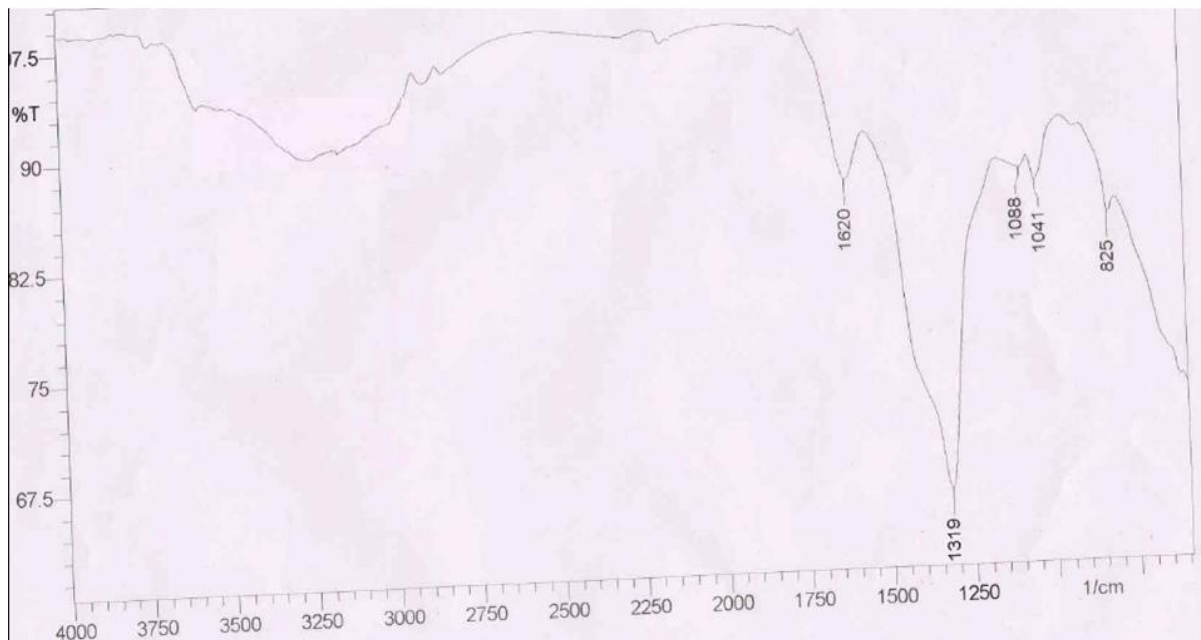

**Figure: S1(d) IR Spectrum of  $[\text{Fe} (\text{C}_{36}\text{H}_{36}\text{N}_4) \text{Cl}] \text{Cl}_2$**

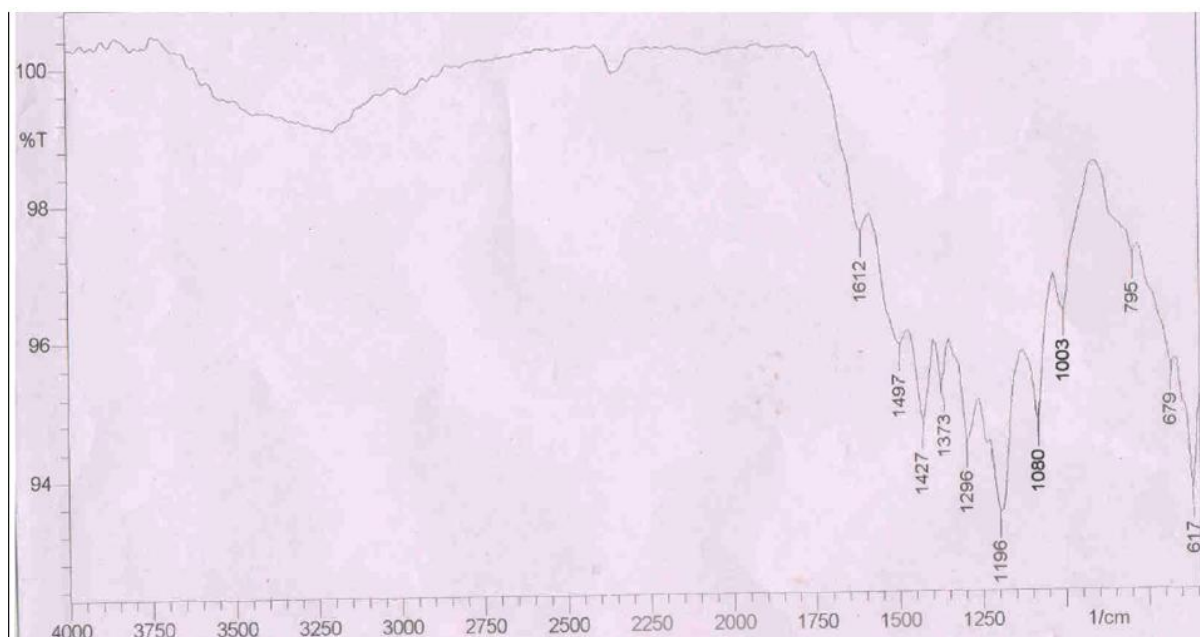

**Figure: S1(e) IR Spectrum of  $[\text{Fe}(\text{C}_{36}\text{H}_{36}\text{N}_4)\text{NO}_3](\text{NO}_3)_2$**

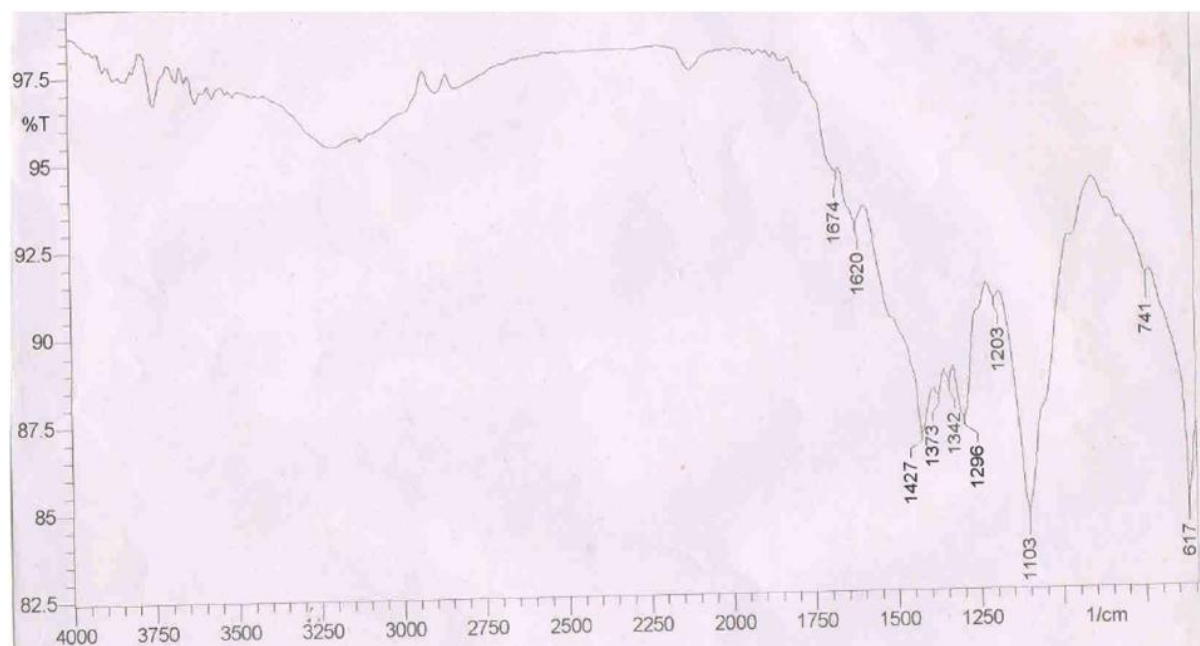

I

**Figure: S1(f) IR Spectrum of  $[\text{Fe}(\text{C}_{36}\text{H}_{36}\text{N}_4)(\text{OAc})](\text{OAc})_2$**

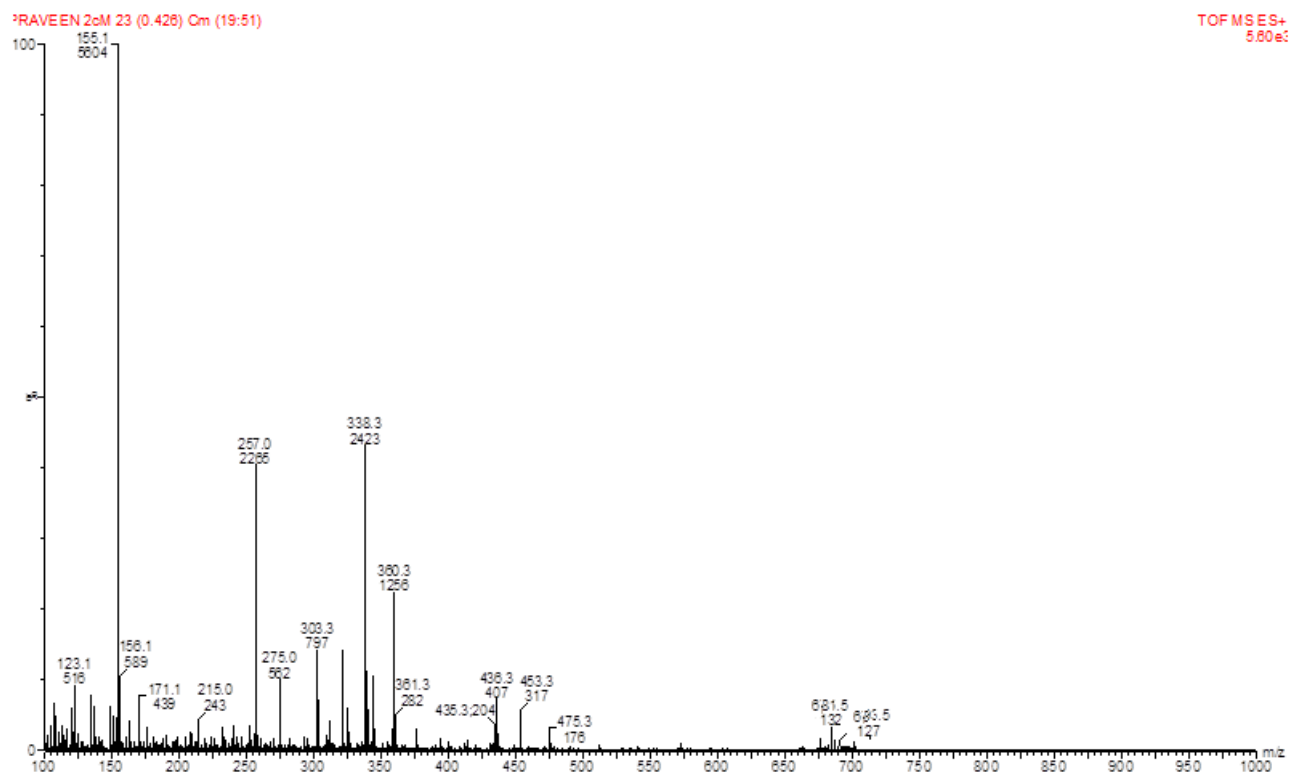

Figure: S2 Mass Spectrum of  $[\text{Cr}(\text{C}_{36}\text{H}_{36}\text{N}_4)\text{Cl}](\text{Cl})_2$

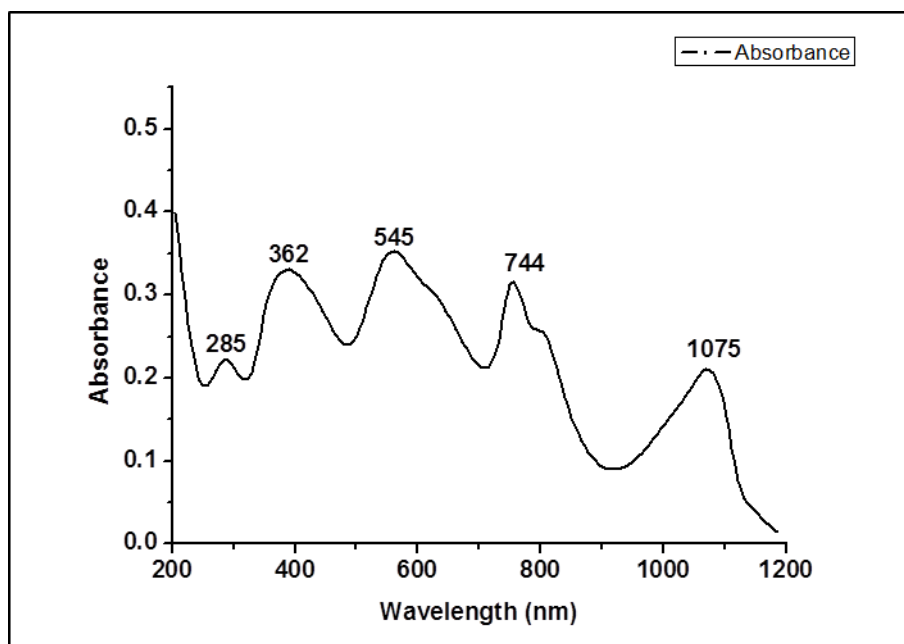

Figure: S3(a) Electronic Spectra of [Cr (C<sub>36</sub>H<sub>36</sub>N<sub>4</sub>) Cl] Cl<sub>2</sub>

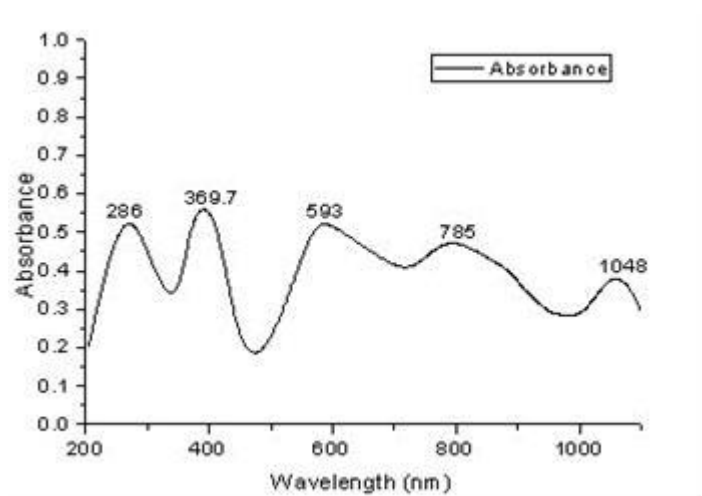

Figure: S3(b) Electronic Spectra of [Cr (C<sub>36</sub>H<sub>36</sub>N<sub>4</sub>) NO<sub>3</sub>] (NO<sub>3</sub>)<sub>2</sub>

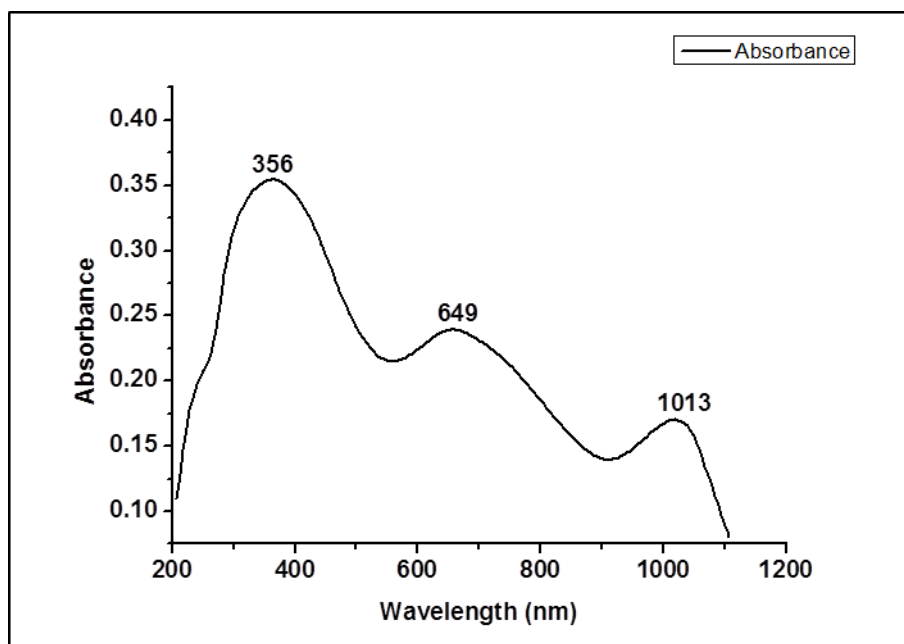

**Figure: S3(c) Electronic Spectra of [Fe (C<sub>36</sub>H<sub>36</sub>N<sub>4</sub>) Cl] Cl<sub>2</sub>**

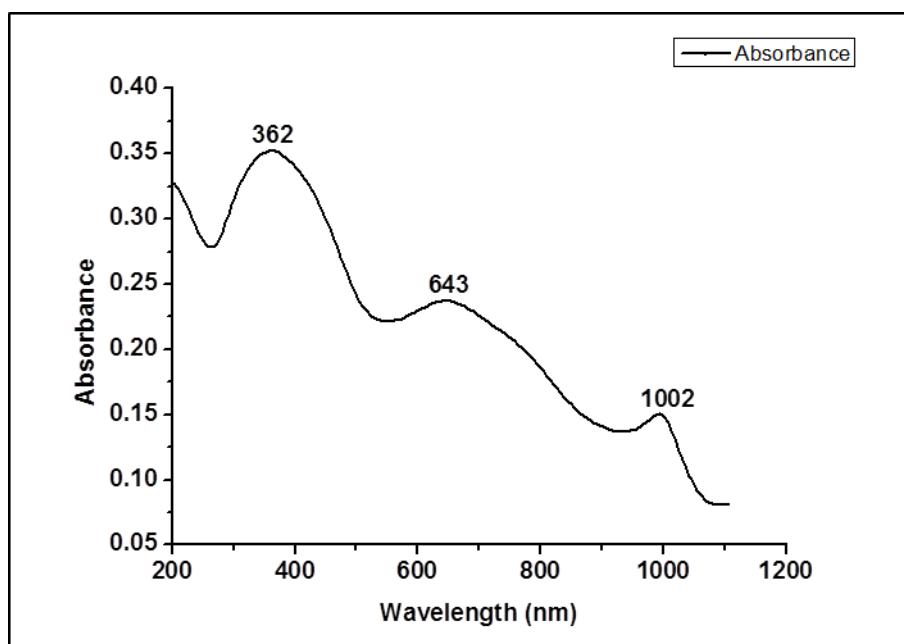

**Figure: S3(d) Electronic Spectra of [Fe (C<sub>36</sub>H<sub>36</sub>N<sub>4</sub>) NO<sub>3</sub>] (NO<sub>3</sub>)<sub>2</sub>**

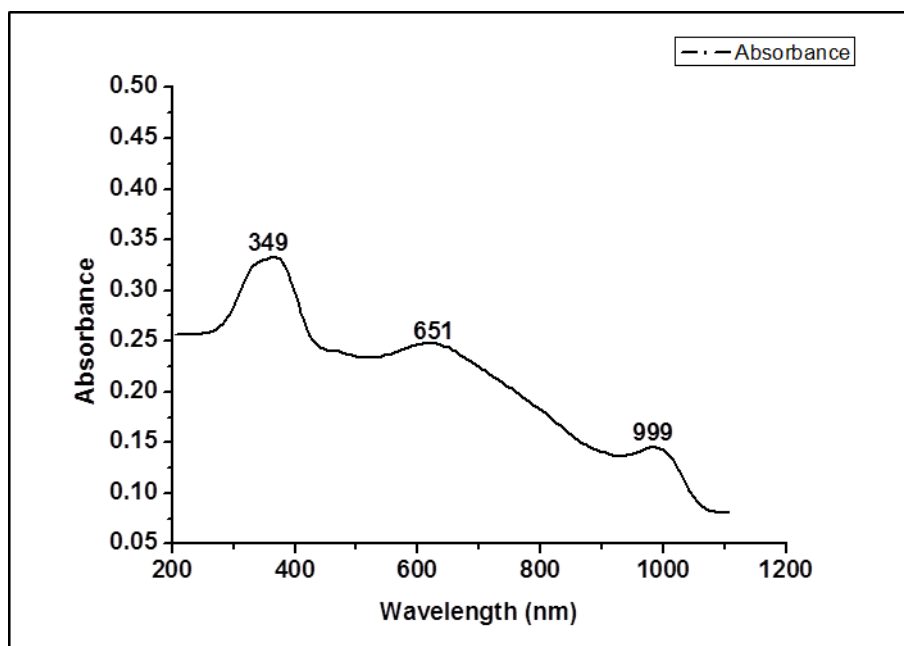

**Figure: S3(e) Electronic Spectra of [Fe (C<sub>36</sub>H<sub>36</sub>N<sub>4</sub>) (OAc)] (OAc)<sub>2</sub>**

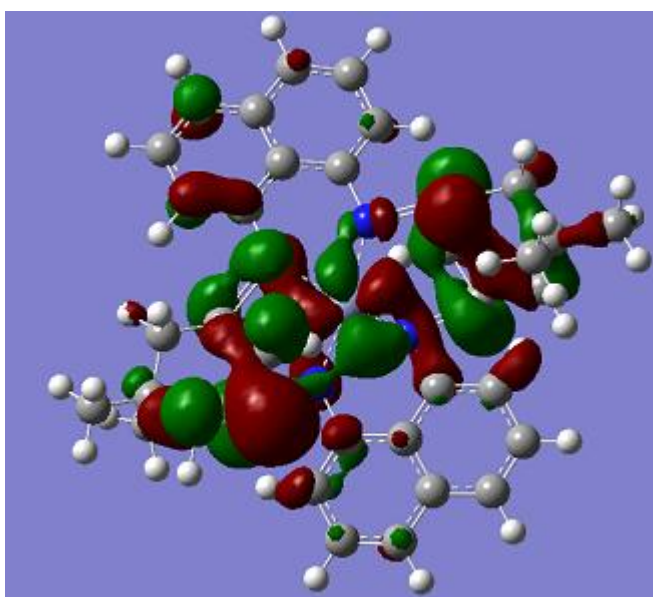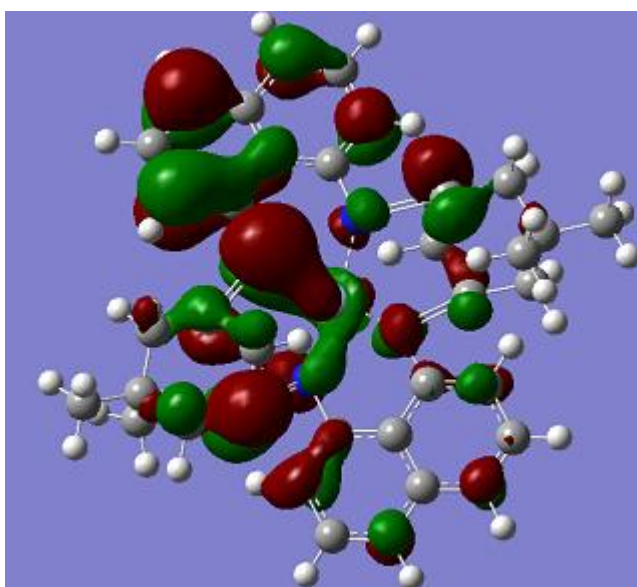

**Figure: S4 HOMO-LUMO orbitals of B3LYP geometry optimized structure of [Cr (C<sub>36</sub>H<sub>36</sub>N<sub>4</sub>) Cl] (Cl)<sub>2</sub>**



**Supplementary Material Figure Captions:**

**Figure: S1(a) IR Spectrum of [Cr (C<sub>36</sub>H<sub>36</sub>N<sub>4</sub>) Cl] Cl<sub>2</sub>**

**Figure: S1(b) IR Spectrum of [Cr (C<sub>36</sub>H<sub>36</sub>N<sub>4</sub>) NO<sub>3</sub>] (NO<sub>3</sub>)<sub>2</sub>**

**Figure: S1(c) IR Spectrum of [Cr (C<sub>36</sub>H<sub>36</sub>N<sub>4</sub>) (OAc)] (OAc)<sub>2</sub>**

**Figure: S1(d) IR Spectrum of [Fe (C<sub>36</sub>H<sub>36</sub>N<sub>4</sub>) Cl] Cl<sub>2</sub>**

**Figure: S1(e) IR Spectrum of [Fe (C<sub>36</sub>H<sub>36</sub>N<sub>4</sub>) NO<sub>3</sub>] (NO<sub>3</sub>)<sub>2</sub>**

**Figure: S1(f) IR Spectrum of [Fe (C<sub>36</sub>H<sub>36</sub>N<sub>4</sub>) (OAc)] (OAc)<sub>2</sub>**

**Figure: S2 Mass Spectrum of [Cr (C<sub>36</sub>H<sub>36</sub>N<sub>4</sub>) Cl] (Cl)<sub>2</sub>**

**Figure: S3(a) Electronic Spectra of [Cr (C<sub>36</sub>H<sub>36</sub>N<sub>4</sub>) Cl] Cl<sub>2</sub>**

**Figure: S3(b) Electronic Spectra of [Cr (C<sub>36</sub>H<sub>36</sub>N<sub>4</sub>) NO<sub>3</sub>] (NO<sub>3</sub>)<sub>2</sub>**

**Figure: S3(c) Electronic Spectra of [Fe (C<sub>36</sub>H<sub>36</sub>N<sub>4</sub>) Cl] Cl<sub>2</sub>**

**Figure: S3(d) Electronic Spectra of [Fe (C<sub>36</sub>H<sub>36</sub>N<sub>4</sub>) NO<sub>3</sub>] (NO<sub>3</sub>)<sub>2</sub>**

**Figure: S3(e) Electronic Spectra of [Fe (C<sub>36</sub>H<sub>36</sub>N<sub>4</sub>) (OAc)] (OAc)<sub>2</sub>**

**Figure: S4 HOMO-LUMO orbitals of B3LYP geometry optimized structure of [Cr (C<sub>36</sub>H<sub>36</sub>N<sub>4</sub>) Cl] (Cl)<sub>2</sub>**
